# Supplementary material for: Whole-Genome Analysis Reveals That Active Heat Shock Factor Binding Sites Are Mostly Associated with Non-Heat Shock Genes in Drosophila melanogaster
Source: PLoS One. 2011 Jan 14;6(1):e15934. doi: 10.1371/journal.pone.0015934 (PMC3021535; doi:10.1371/journal.pone.0015934)
Supplement: Table S3 — Complete list of genes exhibiting a 2 fold or greater change in response to heat shock in either Kc cells, wild type ( dp ), and Hsf mutant ( Hsf4 ) larvae. The position of the nearest HSF binding site to each gene is also given. (XLS) [file pone.0015934.s003.xls]

## Sheet: data table
sequence ID	HS vs RT fold change (cells)	FRD corrected p-value (cells)	HS vs RT fold change (larvae)	FRD corrected p-value (larvae)	gene symbol	gene transcript	position of closest HSF binding site relative to TSS (bp)	location of nearest HSF bound segment (release 4)	HSF ip vs WCE fold change	HSF ip vs WCE segment min P[Xbar]	cytology	staining intensity in polytene data (Westwood et al., 1991)	HS vs RT fold change (hsf4 larvae)	p-value (hsf4 larvae)
FBtr0082638	32.1201	1.6e-09	140.213	8.27e-10	Hsp70Bc	CG6489-RA	-130728	chr3R:8203532-8205028	12.6719	6.35e-09	87B		#N/A	#N/A
FBtr0112520	#N/A	#N/A	#N/A	#N/A	pgc								15.6551	0.000968
FBtr0086264	1.76211	0.0109	5.39288	0.000145	Obp57d	CG30150-RA	-121683	chr2R:16184731-16186638	3.85281	9.51e-07	57A	0.75	10.9407	0.00352
FBtr0073069	3.18699	0.000789	14.477	3.07e-05	CG14961	CG14961-RA	-79865	chr3L:3233279-3234405	4.93341	0.000251531	63D		9.05744	0.000695
FBtr0077931	-1.01164	0.949	4.49558	0.00118	CG31926	CG31926-RA	105281	chr2L:1600242-1601492	2.61406	0.000145287	22A		7.81054	0.0185
FBtr0086934	-1.13473	0.251	-1.07745	0.913	CG4847								7.65199	0.00396
FBtr0088535	1.07756	0.451	3.56351	6.7e-05	CG30340	CG30340-RA	4823	chr2R:5107423-5109091	15.6739	1.17e-10	45F		7.2973	0.0407
FBtr0084737	-1.22441	0.397	4.43603	0.00118	niki	CG10951-RA	259829	chr3R:20390880-20392074	4.93341	0.000613041	96A	1	6.45123	0.00984
FBtr0073362	9.93316	4.12e-08	6.74494	0.000121	CG7509	CG7509-RA	-13407	chr3L:4799198-4800295	5.91734	0.000381369	64B	0.75	6.24345	0.0698
FBtr0076381	-1.0107	0.968	8.85717	2.9e-06	CG3280	CG3280-RA	88775	chr3L:9665344-9667424	22.099	3.17e-06	67C	2	6.17075	0.0281
FBtr0084761	-1.23101	0.423	-1.06492	0.695	CG11790								6.11504	0.000201
FBtr0080264	2.53386	3.55e-06	7.02422	5.14e-06	CG14937	CG14937-RA	-218089	chr2L:12010950-12012501	2.61406	0.000331293	33A		5.79984	0.0083
FBtr0087993	-1.06546	0.789	5.30837	0.000371	Cyp6t3	CG8457-RA	-17684	chr2R:7688406-7691781	25.3417	3.36e-11	48E	1.5	5.72763	0.0166
FBtr0074248	10.9302	0.000119	4.4785	0.00238	CG12507	CG12507-RA	163692	chrX:15936212-15937459	4.22644	7.42e-05	14B		5.56445	0.000149
FBtr0075415	2.39345	0.000534	5.08009	1.47e-06	CG13035	CG13035-RB	-96856	chr3L:16461590-16462748	1.61681	0.000809112	72E		5.46738	0.0514
FBtr0076623	3.47438	0.00291	18.7001	4.86e-07	se	CG6781-RA	-1909	chr3L:8491968-8493217	34.2936	1e-06	66D		5.33151	0.0327
FBtr0073040	1.31542	0.0024	15.1469	2.69e-06	Hsp83	CG1242-RA	5	chr3L:3175521-3178638	71.1471	7.58e-08	63B		4.92252	0.00594
FBtr0077973	1.05258	0.879	1.49978	0.018	CG5011								4.72221	0.00476
FBtr0086323	1.6911	0.0166	3.47912	0.000321	CG13869	CG13869-RA	-431681	chr2R:16184731-16186638	3.85281	9.51e-07	56F	0.25	4.70263	0.019
FBtr0089695	1.35511	0.344	5.954	0.00385	Gr89a	CG14901-RA	49112	chr3R:12274755-12276229	10.0715	1.39e-09	89B	0.75	4.45778	0.143
FBtr0075046	2.7014	0.000305	4.2599	0.00305	CG11619	CG11619-RA	-104557	chr3L:19057644-19058461	5.91734	0.000520803	75F	1	4.36224	0.0145
FBtr0078975	2.95109	0.000529	5.68965	0.00113	TwdlF	CG14639-RA	-31204	chr3R:41215-42007	9.82077	2.24e-05	82A		4.20616	0.251
FBtr0086321	1.51777	0.0708	2.79972	0.00291	ppk6	CG11209-RA	-423208	chr2R:16184731-16186638	3.85281	9.51e-07	56F	0.25	4.12621	0.0574
FBtr0071854	1.05792	0.784	1.09521	0.569	CG4269								4.02001	0.00922
FBtr0088611	2.00783	0.000248	3.76906	0.00049	CG8026	CG8026-RA	-238705	chr2R:4941533-4944342	10.3195	4.05e-10	45B		3.87618	0.0267
FBtr0076676	2.59152	0.000855	13.4681	9.37e-06	CG17352	CG17352-RD	-4134	chr3L:8333890-8335098	5.59798	4.96e-05	66C		3.87119	0.0382
FBtr0082171	2.35396	0.000752	4.60032	0.0306	CG12807	CG12807-RA	83243	chr3R:5905820-5907221	5.27034	7.5e-07	85F	0.5	3.79879	0.171
FBtr0073181	10.7485	4.02e-08	15.3716	2e-05	Gr63a	CG14979-RA	-5900	chr3L:3885132-3887489	36.1557	2.44e-07	63F		3.73343	0.16
FBtr0084180	1.64079	0.177	3.26701	0.00799	CG5791	CG5791-RA	-136498	chr3R:17775572-17777096	7.41461	3.23e-06	94A		3.72328	0.282
FBtr0075416	-1.11587	0.353	3.94182	0.00168	CG13036	CG13036-RA	-105232	chr3L:16461590-16462748	1.61681	0.000809112	72E		3.70716	0.0145
FBtr0089326	1.0194	0.895	2.46364	0.00813	CG11538	CG11538-RA	-283144	chr3L:12388088-12389562	4.93341	7.73e-05	68F		3.66997	0.212
FBtr0076829	1.98067	0.0215	5.57893	0.000368	CG16998	CG16998-RA	-325724	chr3L:7838853-7840951	34.7272	6.14e-07	66A		3.62743	0.0911
FBtr0080238	4.865	6.19e-05	5.27367	0.00156	spz4	CG14928-RA	506289	chr2L:12010950-12012501	2.61406	0.000331293	32F		3.5913	0.175
FBtr0080554	1.95168	0.0196	3.35064	0.00224	Ance-2	CG16869-RA	-5183	chr2L:13903924-13904965	3.85281	3.02e-05	34E		3.59075	0.232
FBtr0074479	7.43839	1.96e-07	2.88103	0.00206	CG12990	CG12990-RA	249793	chrX:17255372-17256361	7.1266	4.97e-05	16B		3.39399	0.133
FBtr0086316	1.33198	0.279	2.95918	0.000461	CG11048	CG11048-RA	430795	chr2R:16184731-16186638	3.85281	9.51e-07	56F	0.25	3.37518	0.0271
FBtr0085717	5.32939	0.0011	5.7937	0.024	CG12071	CG12071-RB	106646	chr3R:26599221-26600273	2.61406	0.000963387	100A		3.23864	0.086
FBtr0079620	10.6202	2.36e-06	1.47275	0.455	CG8086	CG8086-RC	77445	chr2L:8169578-8171233	6.83333	2.6e-07	28F	1	3.17102	0.185
FBtr0078427	-1.75558	0.0442	5.02397	0.00263	CG33291	CG33291-RA	195063	chr3L:21773387-21774773	10.3195	3.34e-06	78E		3.15915	0.269
FBtr0070969	-1.00155	0.998	6.89055	0.000646	iav	CG4536-RA	-159806	chrX:6498629-6500630	32.8302	1.25e-07	6D		3.11239	0.0853
FBtr0072566	5.35168	0.000181	1.20291	0.568	CG13891	CG13891-RA	304793	chr3L:111293-113535	31.4881	2.43e-07	61C	1	3.05169	0.133
FBtr0087818	1.42353	0.0763	4.18757	3.25e-06	CG30488	CG30488-RA	-23985	chr2R:8387633-8388608	7.97637	7.91e-06	49D	1	2.95825	0.146
FBtr0080165	-1.13014	0.348	2.75535	0.00666	aub	CG6137-RA	770745	chr2L:10229925-10231807	26.6525	3.14e-08	32C		2.95321	0.0696
FBtr0083016	-2.08432	0.00185	1.76096	0.0788	smp-30	CG7390-RB	7608	chr3R:10564861-10566529	12.6719	1.33e-09	88D	1	2.94382	0.259
FBtr0075260	3.57882	2.68e-06	4.86373	0.0797	CG33256	CG33256-RA	-93863	chr3L:16773443-16774725	26.8143	5.54e-05	73D		2.91901	0.194
FBtr0074389	5.01468	7.78e-05	2.00942	0.16	CG5070	CG5070-RA	-54452	chrX:16981807-16985919	25.5071	1.7e-07	15F		2.81299	0.289
FBtr0075552	1.75985	0.000185	-2.19506	0.289	Eip71CD								2.74833	0.00328
FBtr0079174	1.95844	0.00923	3.05067	0.0039	Ucp4B	CG18340-RA	7831	chr2L:5976954-5979658	22.6244	1.23e-10	26A		2.66769	0.00257
FBtr0076945	-1.07072	0.592	2.41977	0.00818	Prat2	CG10078-RA	-42044	chr3L:6928762-6930466	22.4499	4.39e-07	65D		2.5934	0.268
FBtr0086275	1.2016	0.158	4.3371	0.000649	CG8908	CG8908-RB	405850	chr2R:16184731-16186638	3.85281	9.51e-07	56F	0.25	2.58045	0.102
FBtr0070150	1.07803	0.548	4.12348	0.00963	CG13362	CG13362-RA	-7657	chrX:615150-616621	4.58596	5.01e-05	1C	2	2.52829	0.106
FBtr0086700	1.12563	0.0279	5.39994	0.00434	Pepck	CG17725-RB	-7179	chr2R:14043818-14045548	16.6846	1.44e-10	55D		2.48472	0.388
FBtr0076440	1.35938	0.0525	2.36811	0.00378	CG32040	CG32040-RA	10330	chr3L:9337241-9339092	10.0715	5.69e-06	67B	4	2.4839	0.256
FBtr0273320	1.25801	0.235	-1.12959	0.764	CG13024	0.885279							2.46124	0.00704
FBtr0076360	1.42924	0.0404	2.86628	0.00818	CG6709	CG6709-RA	201274	chr3L:9665344-9667424	22.099	3.17e-06	67D		2.44316	0.12
FBtr0081366	4.62347	0.000125	1.76906	0.284	CG15130	CG15130-RA	-311759	chr2L:20723157-20724280	4.58596	0.00011428	38C	1	2.4339	0.45
FBtr0077963	3.60174	2.09e-06	2.30328	0.0299	CG14341	CG14341-RB	-82778	chr2L:1082720-1084453	2.61406	1.03e-05	21F		2.41616	0.266
FBtr0089983	2.08764	0.00031	4.66317	0.0728	Fur1	CG10772-RD	-188391	chr3R:21486250-21488367	17.6688	2.35e-07	96DE		2.41212	0.165
FBtr0076457	-1.28873	0.123	4.83597	1.48e-06	aay	CG3705-RA	-39540	chr3L:9354259-9358447	69.883	6.69e-08	67B	4	2.41065	0.11
FBtr0074764	1.28459	0.31	6.25084	6.49e-05	CG14221	CG14221-RA	-30915	chrX:19485503-19486724	4.93341	2.23e-05	18D		2.41058	0.0705
FBtr0079237	1.37139	0.183	4.02975	0.00491	CG13992	CG13992-RA	-10215	chr2L:5976954-5979658	22.6244	1.23e-10	26A		2.39877	0.169
FBtr0079496	1.08883	0.323	2.18547	0.00165	CG7149	CG7149-RA	-210169	chr2L:7999748-8001361	25.8367	1.14e-08	28C		2.3669	0.0329
FBtr0070707	2.52854	2.63e-05	2.59118	0.0165	ctp	CG6998-RA	-568026	chrX:3964590-3966203	10.0715	3.75e-06	4C		2.36272	0.0372
FBtr0088692	1.30982	0.0429	2.00077	0.0272	rgr								2.33162	0.000127
FBtr0273260	-1.29888	0.102	-1.15262	0.579	CG11898								2.31146	0.00233
FBtr0071356	3.3668	0.00268	1.32862	0.118	CG10970	CG10970-RA	-18425	chrX:8934501-8936155	18.6294	2.93e-07	8C	1	2.25384	0.0967
FBtr0081778	-1.1716	0.0431	1.10876	0.633	CG18747								2.24625	0.00275
FBtr0071457	1.9058	0.00445	4.27939	0.00192	CG32680	CG32680-RB	229750	chrX:10108409-10109674	14.8441	1.23e-06	9D		2.22376	0.0427
FBtr0084884	1.15273	0.441	2.13342	0.0017	CG5071	CG5071-RB	43034	chr3R:21486250-21488367	17.6688	2.35e-07	96E		2.19278	0.0511
FBtr0082992	-1.00118	0.997	2.40433	0.00626	CG14856	CG14856-RA	-59276	chr3R:10564861-10566529	12.6719	1.33e-09	88D	1	2.17524	0.0996
FBtr0075817	1.18189	0.4	3.65378	0.00529	CG10710	CG10710-RA	39259	chr3L:13453542-13454779	36.4384	5.5e-07	70B		2.16853	0.0198
FBtr0086799	1.15918	0.0327	5.28706	4.9e-05	olf186-M	CG14489-RA	2098	chr2R:13363116-13364637	8.25073	7.97e-08	54F	1.5	2.13142	0.0824
FBtr0100106	2.44167	4.83e-05	1.9193	0.0541	CG34051	CG34051-RA	418437	chr2L:19537963-19539359	17.6688	5.06e-10	38A	1	2.12229	0.375
FBtr0081359	2.30504	0.000756	1.99498	0.0776	CG11019	CG11019-RA	309952	chr2L:20723157-20724280	4.58596	0.00011428	38C	1	2.12205	0.292
FBtr0074384	1.07199	0.749	1.0222	0.955	CG4991								2.10913	0.00141
FBtr0071399	1.00047	0.999	2.68916	0.00356	CG32696	CG32696-RB	-6436	chrX:9723983-9725481	4.93341	0.0001422	9A		2.09504	0.283
FBtr0089034	1.22381	0.451	3.49284	0.00367	Tsp42En	CG12839-RA	-66819	chr2R:2496872-2498253	25.8367	1.25e-10	42E		2.08234	0.127
FBtr0082957	3.28511	0.00303	1.00163	0.999	CG14852	CG14852-RA	59796	chr3R:10450534-10452340	17.8628	1.69e-10	88C		2.07749	0.258
FBtr0082749	3.58794	2.7e-05	-1.10613	0.825	CheA87a	CG14379-RA	13231	chr3R:9207569-9209544	36.014	2.57e-11	87E	2	2.06783	0.547
FBtr0083042	3.10798	7.68e-05	1.61232	0.31	CG6974	CG6974-RA	-15039	chr3R:10919193-10921110	8.78775	1.77e-09	88E		2.05927	0.496
FBtr0075806	3.89368	3.73e-08	29.3918	7.13e-10	stv	CG32130-RD	-421	chr3L:13453542-13454779	36.4384	5.5e-07	70B		2.04955	0.0667
FBtr0088447	2.19788	0.00176	1.66569	0.0943	Mef2	CG1429-RE	-31595	chr2R:5501886-5502781	1.61681	0.000442275	46C		2.04512	0.361
FBtr0089031	-1.17312	0.327	1.4202	0.209	Tsp42Ek								2.0322	0.0088
FBtr0086801	1.46888	0.027	5.86766	0.000148	CG14490	CG14490-RA	-12000	chr2R:13363116-13364637	8.25073	7.97e-08	54F	1.5	2.03195	0.24
FBtr0087676	3.23668	2.84e-05	1.93378	0.0258	CG13333	CG13333-RA	36014	chr2R:9107112-9110325	16.4846	8.42e-11	50B	1	2.0302	0.581
FBtr0080482	3.62583	0.00022	-1.00786	0.992	CG15480	CG15480-RA	-43019	chr2L:13267749-13269207	2.61406	7.06e-05	34A	1	2.00925	0.577
FBtr0070505	4.10304	0.000321	2.45454	0.145	CG2652	CG2652-RA	35758	chrX:2502403-2504542	32.9778	1.63e-07	3B		2.00595	0.23
FBtr0100612	-1.13181	0.639	2.11045	0.00859	yuri	CG31732-RG	224033	chr2L:15034158-15035283	6.22925	7.89e-06	35C		2.0031	0.00463
FBtr0087453	2.31107	0.0013	1.25674	0.575	Cyp6a19	CG10243-RA	26725	chr2R:10419053-10419906	8.52112	0.000829908	51D		1.97912	0.49
FBtr0073473	-1.5342	0.218	8.34216	0.000104	CG15199	CG15199-RA	32182	chrX:10953139-10954646	41.7729	2.34e-07	10A	1	1.97204	0.0178
FBtr0084331	2.44906	0.000211	1.32268	0.153	CG13842	CG13842-RA	22957	chr3R:18509063-18510627	12.4458	9.58e-07	94C	1	1.97203	0.402
FBtr0082613	1.00829	0.97	4.64509	0.000195	CG10041	CG10041-RA	-13974	chr3R:8191066-8192721	7.41461	6.25e-07	87B		1.94642	0.0129
FBtr0083716	2.26485	0.00359	2.79715	0.0221	cdi	CG6027-RA	348550	chr3R:14570885-14573781	2.14149	3.04e-06	91EF		1.94572	0.262
FBtr0070271	1.26727	0.295	2.50418	0.000639	CG14797	CG14797-RA	-62259	chrX:1476542-1479027	13.3398	1.17e-06	2B		1.93885	0.0444
FBtr0072826	1.0958	0.414	4.54786	0.0002	CG7879	CG7879-RA	-49847	chr3L:1600850-1602693	11.7562	1.22e-05	62A		1.93383	0.0858
FBtr0077242	4.63904	1.28e-07	6.51368	0.0256	Mgstl	CG1742-RA	-7189	chrX:20845683-20847587	54.387	1.19e-06	19E		1.93324	0.613
FBtr0082404	2.08691	0.000236	1.50836	0.126	ninaG	CG6728-RA	-193275	chr3R:7439720-7442053	8.52112	3.51e-07	86E		1.92368	0.521
FBtr0083988	8.3031	0.00012	1.48781	0.199	CG17275	CG17275-RA	9124	chr3R:16676046-16677036	3.05133	0.000316202	93A		1.86114	0.639
FBtr0074416	2.24354	0.00738	1.30065	0.324	CG13000	CG13000-RA	-200221	chrX:16981807-16985919	25.5071	1.7e-07	15C		1.85012	0.541
FBtr0071798	4.29003	0.00317	1.51559	0.368	CG13502	CG13502-RB	8887	chr2R:17585602-17587220	5.91734	0.000615364	58B	0.5	1.82621	0.616
FBtr0071803	2.68453	0.00113	1.61147	0.0571	CG11475	CG11475-RA	-7458	chr2R:17585602-17587220	5.91734	0.000615364	58B	0.5	1.81573	0.0261
FBtr0086710	-1.08758	0.481	2.2176	0.0046	Eip55E	CG5345-RA	1418	chr2R:14143209-14144805	5.91734	2.46e-07	55E	0.25	1.80164	0.521
FBtr0084834	2.25868	0.00222	1.11522	0.865	CG31437	CG31437-RA	277732	chr3R:21486250-21488367	17.6688	2.35e-07	96D		1.77159	0.636
FBtr0073406	-1.18195	0.419	3.73208	0.000472	CG1637	CG1637-RC	-213886	chrX:10935713-10937770	16.0815	9.45e-06	9F		1.76518	0.374
FBtr0073765	2.51152	0.000624	3.9002	0.00046	CG32636	CG32636-RA	315	chrX:13165894-13167772	11.5223	1.15e-06	11E		1.7644	0.473
FBtr0086756	2.00027	0.00479	1.4498	0.552	CG14502	CG14502-RB	106265	chr2R:13912857-13913941	2.61406	1.7e-05	55C	1	1.75501	0.39
FBtr0085312	2.40931	0.000864	1.07732	0.866	CheB98a	CG14531-RA	28937	chr3R:24660831-24662039	5.91734	0.000417497	98E		1.74019	0.693
FBtr0076654	1.55634	0.0107	2.5867	2.09e-05	CG6673	CG6673-RB	4858	chr3L:8491968-8493217	34.2936	1e-06	66D		1.73909	0.137
FBtr0083593	1.2918	0.11	2.09842	0.00666	CG7126	CG7126-RA	10392	chr3R:14117414-14118896	5.91734	3.68e-06	91A		1.73268	0.0564
FBtr0088404	1.09518	0.404	3.00475	0.00203	CG12920	CG12920-RA	52281	chr2R:5632872-5634357	4.22644	0.00010236	46E	0.5	1.71967	0.212
FBtr0074755	1.32702	0.258	6.19793	0.000219	CG14227	CG14227-RA	4859	chrX:19517241-19518787	19.5685	4.86e-07	18E		1.71052	0.0561
FBtr0081434	1.50298	0.026	2.96772	0.00178	CG9266	CG9266-RB	50162	chr2L:20905781-20907052	3.46237	1.29e-07	38F-39A		1.70753	0.285
FBtr0076815	3.2735	0.00109	1.98436	0.129	CG32375	CG32375-RA	-147221	chr3L:7838853-7840951	34.7272	6.14e-07	66A		1.70572	0.499
FBtr0071698	2.0594	0.00874	1.85932	0.25	CG30288	CG30288-RA	-86094	chr2R:17112195-17114879	18.2479	5.31e-08	57E		1.67461	0.167
FBtr0091932	4.89584	0.000344	1.74536	0.263	CG33928	CG33928-RA	677017	chr2L:16754945-16756107	5.27034	4.85e-06	36C		1.66709	0.373
FBtr0089706	2.01783	0.00792	1.9568	0.245	MESK2	CG15669-RK	103983	chr2R:17112195-17114879	18.2479	5.31e-08	57E		1.65446	0.35
FBtr0073788	3.34498	0.00165	1.54108	0.217	CG12725	CG12725-RA	70026	chrX:13165894-13167772	11.5223	1.15e-06	11F		1.64226	0.491
FBtr0075779	5.9928	0.000128	1.50259	0.0545	CG8100	CG8100-RA	-46181	chr3L:14002076-14004156	30.1201	1.31e-07	70D		1.62704	0.369
FBtr0086179	2.56932	0.000237	-1.31799	0.301	Tsp42Ec	CG12847-RA	-20492	chr2R:2496872-2498253	25.8367	1.25e-10	42E		1.61645	0.322
FBtr0080873	-1.01824	0.889	2.85861	0.000841	CG5953	CG5953-RB	2125	chr2L:16526038-16527453	6.22925	1.96e-06	36A	1.5	1.60472	0.405
FBtr0078826	2.08597	0.00683	1.53378	0.0145	retinophilin	CG10233-RA	-130902	chr3R:1193132-1194818	7.97637	2.16e-07	82F	0.5	1.60221	0.464
FBtr0070946	1.03383	0.778	3.37268	0.000159	APC7	CG14444-RA	57267	chrX:6498629-6500630	32.8302	1.25e-07	6C		1.60129	0.371
FBtr0075982	-1.00171	0.983	2.32953	0.0036	CG32103	CG32103-RA	-472	chr3L:12388088-12389562	4.93341	7.73e-05	69B		1.58257	0.095
FBtr0088830	2.60727	0.00904	-1.50062	0.367	CG12824	CG12824-RA	-7369	chr2R:3293640-3296395	17.0813	1.25e-09	43E	2	1.55176	0.114
FBtr0089438	3.00218	0.00053	4.19551	0.000342	Acp98AB	CG31056-RA	253666	chr3R:23773782-23774898	23.1445	3.75e-07	98B		1.54067	0.508
FBtr0071154	2.10607	0.0013	1.04613	0.949	CG2120	CG2120-RA	-21128	chrX:7958752-7960274	3.46237	3.25e-05	7D	1	1.54044	0.268
FBtr0073361	3.12419	0.00108	1.50965	0.136	CG18808	CG18808-RA	-11275	chr3L:4799198-4800295	5.91734	0.000381369	64B	0.75	1.5384	0.304
FBtr0078646	2.21316	0.000148	1.47656	0.21	CG10991	CG10991-RA	-189087	chr3R:1485026-1486855	6.53438	1.12e-06	83C		1.5306	0.294
FBtr0086641	-1.70124	0.0824	2.08663	0.00523	CG15092	CG15092-RA	-41795	chr2R:14317204-14318408	5.59798	2.9e-08	55F	0.5	1.51295	0.533
FBtr0085246	7.40535	2.28e-06	1.96319	0.144	CG5017	CG5017-RA	36120	chr3R:23773782-23774898	23.1445	3.75e-07	98B		1.50458	0.164
FBtr0084438	-1.18278	0.0234	4.89536	0.00208	CG16710	CG16710-RA	136922	chr3R:19644564-19645983	25.0093	1.01e-07	95A		1.50137	0.508
FBtr0100075	1.1127	0.516	2.46087	0.00339	CG34020	CG34020-RA	-44725	chr2R:14317204-14318408	5.59798	2.9e-08	55F	0.5	1.49812	0.0226
FBtr0087819	1.70433	0.101	3.09003	0.000334	CG17575	CG17575-RA	-25407	chr2R:8387633-8388608	7.97637	7.91e-06	49D	1	1.49811	0.294
FBtr0084710	-1.19022	0.0636	2.09508	0.00522	CG11089	CG11089-RA	-311513	chr3R:20390880-20392074	4.93341	0.000613041	96B		1.4891	0.492
FBtr0086534	2.86516	0.00061	1.42368	0.347	CG7735	CG7735-RA	-19458	chr2R:14938869-14940480	4.22644	4.07e-06	56D	2	1.48785	0.722
FBtr0088333	2.73898	0.00181	3.64172	0.000718	Hdc	CG3454-RA	-119479	chr2R:5632872-5634357	4.22644	0.00010236	46F		1.48756	0.515
FBtr0073474	-1.46856	0.062	3.2898	0.00996	CG32667	CG32667-RA	31414	chrX:10953139-10954646	41.7729	2.34e-07	10A	1	1.48696	0.377
FBtr0085893	2.20341	0.00327	1.12689	0.775	His2A:CG31618	CG31618-RA	-22682	chr2L:21388007-21389248	6.53438	1.39e-07	39D	1	1.48255	0.651
FBtr0088334	2.94531	0.000524	1.64902	0.136	CG12914	CG12914-RA	-126742	chr2R:5632872-5634357	4.22644	0.00010236	46F		1.46649	0.396
FBtr0087390	2.17649	2.88e-05	1.58173	0.0986	CG8157	CG8157-RA	4266	chr2R:10836748-10837765	11.988	4.91e-05	51F		1.4633	0.268
FBtr0086690	1.93678	0.00127	2.45162	0.00033	CG5174	CG5174-RB	10890	chr2R:13948169-13949503	4.93341	7.05e-07	55C	1	1.44476	0.647
FBtr0088364	3.53403	0.000323	1.46044	0.208	CG12209	CG12209-RA	126083	chr2R:5632872-5634357	4.22644	0.00010236	46F		1.4419	0.29
FBtr0070826	2.10202	0.000982	1.3163	0.678	CG12236	CG12236-RB	-5827	chrX:5746796-5748210	11.7562	2.62e-06	5C	2	1.42998	0.51
FBtr0080066	3.00889	0.00105	1.1233	0.89	CG13138	CG13138-RB	71211	chr2L:10229925-10231807	26.6525	3.14e-08	31D		1.42707	0.738
FBtr0079679	-1.25982	0.127	4.92369	3.15e-07	d	CG10595-RB	-312259	chr2L:8169578-8171233	6.83333	2.6e-07	29D		1.42617	0.461
FBtr0084341	-1.04023	0.818	2.4522	0.00514	Or94a	CG17241-RA	223592	chr3R:19036051-19037443	15.4683	8.76e-06	94D		1.42552	0.601
FBtr0086235	1.23068	0.453	2.56697	0.000861	CG13437	CG13437-RA	9033	chr2R:16184731-16186638	3.85281	9.51e-07	57A	0.75	1.42335	0.149
FBtr0089480	1.34461	0.147	2.88301	0.000227	att-ORFA	CG4241-RA	10600	chr3R:16372062-16374028	27.6171	1.24e-05	92F		1.42177	0.0761
FBtr0081149	1.11418	0.618	2.06978	0.00992	Phlpp	CG10493-RA	100934	chr2L:19155896-19158021	4.93341	7.73e-06	37B	1	1.40617	0.625
FBtr0087814	1.35895	0.0103	2.69512	0.000103	CG3814	CG3814-RB	-2589	chr2R:8394919-8396661	9.82077	1.39e-09	49D	1	1.40104	0.112
FBtr0084138	2.19198	9.28e-05	1.27778	0.488	CG31178	CG31178-RA	76896	chr3R:17775572-17777096	7.41461	3.23e-06	93F	0.75	1.39834	0.293
FBtr0082609	1.64529	0.0504	2.33537	2.4e-05	GstD10	CG18548-RA	-447	chr3R:8191066-8192721	7.41461	6.25e-07	87B		1.39428	0.512
FBtr0079412	3.40171	3.22e-05	1.52518	0.381	CG31906	CG31906-RA	-189448	chr2L:7414217-7416188	4.22644	1.32e-06	27E		1.39127	0.428
FBtr0086944	1.16995	0.412	2.5003	0.000525	CG18631	CG18631-RA	175978	chr2R:13231931-13234677	25.1757	3.41e-11	54C		1.39117	0.419
FBtr0072079	3.64766	0.000693	5.89747	0.0117	CG5428	CG5428-RA	32618	chr2R:19221077-19222779	8.25073	1.34e-08	59F	1.5	1.37924	0.459
FBtr0087277	1.40346	0.0842	2.24715	0.00797	CG30091	CG30091-RA	15013	chr2R:11210120-11211138	4.22644	0.000568727	52B		1.37244	0.0759
FBtr0075701	2.5707	0.000181	1.13267	0.734	CG17173	CG17173-RA	-17624	chr3L:14751486-14752844	11.7562	9.33e-06	70F		1.37117	0.523
FBtr0080432	2.30705	0.0016	1.51508	0.132	Pk34A	CG5182-RA	6654	chr2L:13164478-13166766	76.1079	3.73e-11	34A	1	1.36992	0.441
FBtr0080485	4.71904	0.00219	-1.04619	0.949	kek4	CG9431-RA	49689	chr2L:13164478-13166766	76.1079	3.73e-11	34A	1	1.36971	0.794
FBtr0085262	2.53485	0.00423	1.04173	0.917	CG31131	CG31131-RA	14587	chr3R:23773782-23774898	23.1445	3.75e-07	98B		1.36726	0.801
FBtr0073664	-1.00839	0.957	2.64634	0.00636	CG15729	CG15729-RA	-101868	chrX:12500388-12502334	20.488	9.8e-07	11B		1.36124	0.124
FBtr0081970	1.05812	0.237	2.09585	0.000946	CG11033	CG11033-RA	-740	chr3R:4877169-4877828	27.9354	0.000145608	85C	1	1.3533	0.646
FBtr0073927	1.76044	0.00385	3.80382	0.00601	l(1)G0469	CG32597-RA	2448	chrX:14042419-14043779	20.8507	5.05e-07	12E	1	1.35015	0.551
FBtr0079431	-1.66607	0.299	2.16919	0.00118	ade3	CG31628-RB	57524	chr2L:6965928-6966885	37.5596	9.8e-12	27D		1.34921	0.632
FBtr0085147	2.04584	0.00037	1.52636	0.218	Nep5	CG6265-RA	802644	chr3R:22085781-22087405	22.4499	1.23e-06	97E		1.3466	0.711
FBtr0074739	1.16122	0.0279	2.14682	0.00491	Shawn	CG14209-RD	38297	chrX:19485503-19486724	4.93341	2.23e-05	18D		1.34614	0.378
FBtr0100867	2.15904	0.00119	1.14378	0.821	mt:ATPase6	CG34073-RA	#N/A	#N/A	#N/A	#N/A	#N/A		1.33723	0.446
FBtr0072101	2.7124	0.000527	1.90141	0.057	l(2)efl	CG4533-RB	-28720	chr2R:19221077-19222779	8.25073	1.34e-08	59F	1.5	1.33583	0.264
FBtr0100121	3.05471	0.000236	1.99399	0.0138	ste24c	CG9002-RA	-21907	chr2R:12534826-12535857	3.85281	4.97e-07	53E	0.5	1.33385	0.41
FBtr0082026	3.67398	0.000845	1.96731	0.153	CG8129	CG8129-RA	-22088	chr3R:5168973-5171192	11.2864	2.5e-10	85D	1	1.33234	0.0626
FBtr0074362	2.49854	0.00252	-1.30811	0.5	CG9673	CG9673-RA	-5216	chrX:16542143-16543696	9.82077	5.93e-06	15A		1.3306	0.604
FBtr0074800	1.2257	0.0808	2.51016	0.000797	CG32529	CG32529-RA	-184343	chrX:19517241-19518787	19.5685	4.86e-07	18F-19A		1.33035	0.246
FBtr0087937	4.6916	8.99e-05	1.35112	0.509	CG12370	CG12370-RA	164355	chr2R:8164107-8165432	3.85281	0.000130513	49A		1.32556	0.669
FBtr0075653	2.86354	0.00123	1.60231	0.529	CG13457	CG13457-RB	153359	chr3L:14942694-14944002	10.0715	6.73e-06	71B		1.32507	0.656
FBtr0084954	3.29836	0.00662	1.08784	0.873	HLHmdelta	CG8328-RA	239908	chr3R:22062750-22064079	7.41461	4.01e-05	96F		1.32487	0.708
FBtr0084490	2.44325	0.000101	1.25954	0.504	CG31141	CG31141-RA	-104079	chr3R:19644564-19645983	25.0093	1.01e-07	95C	1	1.31791	0.339
FBtr0077832	2.56129	4.05e-06	1.19651	0.58	CG15382	CG15382-RA	-554732	chr2L:1600242-1601492	2.61406	0.000145287	22D		1.31499	0.442
FBtr0071611	3.69699	0.00222	-1.11106	0.752	CG17974	CG17974-RA	182294	chr2R:16675674-16676589	11.2864	1.87e-05	57D	0.75	1.31203	0.677
FBtr0083155	1.70274	0.0294	2.79046	0.00159	CG31296	CG31296-RA	-15982	chr3R:11372128-11373829	3.46237	3.78e-07	88F		1.3096	0.739
FBtr0087077	2.36577	0.000528	-1.06755	0.792	CG15615	CG15615-RA	7651	chr2R:12301736-12303353	8.78775	2.97e-08	53D		1.29972	0.788
FBtr0085598	3.12099	0.000649	1.34553	0.28	janB	CG7931-RA	-116691	chr3R:25980581-25981688	2.61406	0.000222606	99D		1.29919	0.535
FBtr0072215	2.13843	0.0049	2.26308	0.26	Ca-P60A	CG3725-RH	-16084	chr2R:19456664-19457555	24.3385	3.9e-07	60A		1.2977	0.688
FBtr0077522	2.36383	0.000608	1.39378	0.151	CG31776	CG31776-RA	-562755	chr2L:2906934-2908425	6.83333	3.61e-08	23F	1	1.29264	0.551
FBtr0085114	-3.53375	0.000324	-1.10662	0.926	CG5909	CG5909-RA	787415	chr3R:23773782-23774898	23.1445	3.75e-07	97E		1.2815	0.747
FBtr0084330	2.03122	0.00079	1.57203	0.0905	CG4907	CG4907-RA	26530	chr3R:18509063-18510627	12.4458	9.58e-07	94C	1	1.27894	0.531
FBtr0082647	2.16833	0.0013	1.16835	0.72	CG11608	CG11608-RA	-260133	chr3R:8203532-8205028	12.6719	6.35e-09	87C	5	1.27573	0.839
FBtr0080501	3.12957	7.11e-05	1.494	0.303	CG16848	CG16848-RA	-26850	chr2L:13385139-13386607	16.8834	1.35e-08	34B		1.27411	0.447
FBtr0080273	1.52607	0.399	4.1073	0.000239	CG31704	CG31704-RA	171461	chr2L:12010950-12012501	2.61406	0.000331293	33A		1.27296	0.831
FBtr0084525	3.69538	0.00193	1.71622	0.222	CG13597	CG13597-RA	73959	chr3R:19644564-19645983	25.0093	1.01e-07	95C	1	1.27262	0.415
FBtr0089490	-2.27537	0.00259	-1.08638	0.678	PGRP-LC	CG4432-RA	24212	chr3L:9337241-9339092	10.0715	5.69e-06	67B	4	1.27116	0.517
FBtr0075154	2.71032	0.00183	-1.41586	0.018	Tsp74F	CG5492-RB	-16622	chr3L:17877047-17879091	34.2936	4.31e-07	75A		1.26016	0.326
FBtr0087985	2.38032	5.1e-08	1.27011	0.221	CG8407	CG8407-RA	19537	chr2R:7688406-7691781	25.3417	3.36e-11	48E	1.5	1.25954	0.528
FBtr0084439	1.52727	0.124	3.86031	9.84e-05	CG18754	CG18754-RA	135041	chr3R:19644564-19645983	25.0093	1.01e-07	95A		1.2374	0.571
FBtr0085753	1.04848	0.831	3.17528	0.00087	Gycbeta100B	CG1470-RA	85190	chr3R:27044598-27045983	49.1937	1.72e-07	100B	1	1.23723	0.691
FBtr0077186	1.06961	0.767	-2.22586	0.000134	CG14581	CG14581-RA	-71619	chrX:20993655-20995277	5.91734	9.6e-06	19F		1.23496	0.482
FBtr0083143	2.4044	0.000397	1.00257	0.994	Act88F	CG5178-RA	107468	chr3R:11372128-11373829	3.46237	3.78e-07	88F		1.22882	0.834
FBtr0076713	1.21961	0.289	5.30901	1.47e-06	Gr66a	CG7189-RA	-1959	chr3L:8282194-8284182	6.22925	1.64e-05	66C		1.22608	0.775
FBtr0082636	41.9325	1.97e-10	103.324	1.82e-07	Hsp70Bbb	CG5834-RA	-124162	chr3R:8203532-8205028	12.6719	6.35e-09	87B		1.21644	0.764
FBtr0076420	2.79871	0.00069	-1.05524	0.877	Or67b	CG14176-RB	-63423	chr3L:9665344-9667424	22.099	3.17e-06	67C	2	1.21546	0.778
FBtr0078324	2.06815	0.000758	1.17601	0.689	ko	CG10573-RA	-41895	chr3L:21106336-21107682	5.59798	2.94e-05	78B		1.2142	0.621
FBtr0072080	2.25487	0.000862	3.45634	0.0954	CG5431	CG5431-RA	30861	chr2R:19221077-19222779	8.25073	1.34e-08	59F	1.5	1.20616	0.648
FBtr0075556	1.66499	0.0529	5.46232	0.000243	yellow-k	CG7463-RA	-1465	chr3L:15483800-15485003	4.93341	0.000111102	71D		1.20322	0.802
FBtr0085927	2.52687	0.00828	1.20291	0.72	His2B:CG17949	CG17949-RA	22674	chr2L:21388007-21389248	6.53438	1.39e-07	39D	1	1.20004	0.852
FBtr0088539	-1.23895	0.392	4.01688	0.000985	CG12927	CG12927-RA	-2786	chr2R:5107423-5109091	15.6739	1.17e-10	45F		1.19655	0.477
FBtr0085511	2.44981	0.00334	-1.55291	0.181	Jon99Ci	CG31039-RA	142918	chr3R:25608053-25610144	31.7885	6.05e-07	99C		1.1937	0.742
FBtr0087356	3.04653	0.00859	1.23822	0.762	Khc-73	CG8183-RA	-163345	chr2R:11210120-11211138	4.22644	0.000568727	52A		1.1841	0.809
FBtr0074779	3.19234	7.4e-05	1.20754	0.504	CG12231	CG12231-RA	-120412	chrX:19485503-19486724	4.93341	2.23e-05	18C		1.1786	0.792
FBtr0078023	2.68062	0.0038	1.75146	0.00395	ninaA	CG3966-RA	2028	chr2L:878745-879917	2.61406	0.000116247	21E		1.17375	0.636
FBtr0091778	4.99062	0.00428	1.29355	0.515	CG33777	CG33777-RA	114837	chr3L:4420314-4422045	7.97637	4.4e-06	64B	0.75	1.17364	0.873
FBtr0084164	3.33545	0.00141	1.11787	0.538	tsl	CG6705-RA	148878	chr3R:17459056-17460366	21.9226	8.71e-05	93F	0.75	1.17325	0.531
FBtr0082482	31.7345	3.3e-09	169.923	8.76e-10	Hsp70Ab	CG18743-RA	-732	chr3R:7782967-7784262	73.0248	1.95e-10	87A	3	1.16939	0.817
FBtr0084158	3.22471	0.00294	1.03954	0.956	Gr93d	CG31335-RA	-103975	chr3R:17775572-17777096	7.41461	3.23e-06	93F	0.75	1.16553	0.903
FBtr0075935	1.8707	0.0158	2.56944	0.000636	Ent3	CG11010-RA	-99024	chr3L:12727567-12729247	19.7539	2.3e-07	69E		1.16515	0.387
FBtr0089674	2.22077	0.00325	1.77962	0.0925	sut4	CG1380-RA	-34325	chr2R:5632872-5634357	4.22644	0.00010236	46E	0.5	1.15404	0.546
FBtr0084847	2.07784	0.00692	-1.53059	0.337	CG11909	CG11909-RA	-314535	chr3R:21486250-21488367	17.6688	2.35e-07	96D		1.15247	0.305
FBtr0088508	-1.06862	0.587	2.58185	6.91e-05	Pdk	CG8808-RA	4359	chr2R:4941533-4944342	10.3195	4.05e-10	45D	3	1.14733	0.531
FBtr0085300	2.09517	0.00281	1.58118	0.206	Hrb98DE	CG9983-RF	235276	chr3R:24660831-24662039	5.91734	0.000417497	98D		1.1469	0.48
FBtr0072742	-1.02283	0.935	2.00939	0.00915	Cct2	CG18330-RA	-56600	chr3L:1479667-1480905	19.1953	3.11e-07	62A		1.13931	0.828
FBtr0084325	2.08198	0.000211	-1.52811	0.162	Takl2	CG4803-RA	49592	chr3R:18509063-18510627	12.4458	9.58e-07	94C	1	1.13598	0.628
FBtr0100559	14.1048	3.7e-09	226.988	3.29e-08	Hsp22	CG4460-RB	-249	chr3L:9347049-9349358	57.7682	0.000191127	67B	4	1.13555	0.861
FBtr0070599	3.43139	0.00504	1.23508	0.649	Crg-1	CG32788-RB	325341	chrX:3964590-3966203	10.0715	3.75e-06	3F		1.13227	0.604
FBtr0083634	2.01392	0.00468	1.41736	0.385	CG14305	CG14305-RC	-24556	chr3R:14398892-14400484	20.1224	7.35e-10	91B		1.13029	0.687
FBtr0080433	2.63684	0.00133	2.61569	0.00676	CG5204	CG5204-RA	4937	chr2L:13164478-13166766	76.1079	3.73e-11	34A	1	1.12795	0.632
FBtr0084383	3.23735	0.00175	1.55469	0.0646	CG17083	CG17083-RA	66810	chr3R:19046311-19047965	15.4683	1.31e-06	94E		1.12772	0.844
FBtr0081830	2.01223	0.000757	-1.23043	0.5	CG31464	CG31464-RA	13973	chr3R:4130426-4131748	28.0939	4.74e-11	84F	2	1.12656	0.779
FBtr0100110	3.32549	2.02e-06	1.30771	0.482	CG8927	CG8927-RA	5939	chr3R:12012047-12013872	18.4391	1.86e-10	89B	0.75	1.11849	0.886
FBtr0085825	1.70894	0.00765	2.30723	0.00318	ttk	CG1856-RC	2452	chr3R:27552852-27554304	13.3398	7.08e-05	100D	2	1.11755	0.535
FBtr0085194	-2.02579	0.00639	1.08343	0.87	RpS10a	CG12275-RA	295731	chr3R:23773782-23774898	23.1445	3.75e-07	98A		1.1162	0.881
FBtr0086699	1.54945	0.17	2.53311	0.000112	CG10924	CG10924-RA	2156	chr2R:14043818-14045548	16.6846	1.44e-10	55D		1.11508	0.728
FBtr0072193	2.40278	0.00676	-1.38358	0.34	CG30172	CG30172-RA	-23144	chr2R:19561349-19562794	5.27034	4.79e-06	60B	0.75	1.10583	0.787
FBtr0085623	-1.30709	0.163	2.0324	0.00392	Fer2LCH	CG1469-RC	-106802	chr3R:26107728-26108819	6.22925	5.72e-05	99F	1	1.10266	0.87
FBtr0085718	2.42984	0.00132	1.06103	0.859	CG15546	CG15546-RA	101905	chr3R:26599221-26600273	2.61406	0.000963387	100A		1.10134	0.761
FBtr0076571	2.05518	0.00126	55.003	3.06e-08	Cp18	CG6517-RA	-5210	chr3L:8694584-8696468	28.0939	2.24e-07	66D		1.10008	0.494
FBtr0084382	5.15252	2.05e-05	1.85513	0.057	CG4434	CG4434-RA	68948	chr3R:19046311-19047965	15.4683	1.31e-06	94E		1.09065	0.705
FBtr0074403	2.56874	0.00401	1.41989	0.353	CG8918	CG8918-RA	53937	chrX:16981807-16985919	25.5071	1.7e-07	15F		1.07834	0.776
FBtr0087319	1.31499	0.228	2.28231	0.00916	CG30080	CG30080-RA	6111	chr2R:11210120-11211138	4.22644	0.000568727	52C		1.07354	0.907
FBtr0088551	-1.01678	0.934	2.29927	0.00967	CG13955	CG13955-RA	-7178	chr2R:4941533-4944342	10.3195	4.05e-10	45D	3	1.07317	0.943
FBtr0075393	1.18538	0.0524	2.33579	0.000196	mbf1	CG4143-RB	-67	chr3L:16539414-16540751	28.4097	1.2e-06	73A	1	1.06409	0.687
FBtr0088194	-1.15962	0.481	2.67535	0.00537	CG13217	CG13217-RA	2008	chr2R:6750044-6750908	4.58596	0.00013349	47E		1.06266	0.959
FBtr0079531	2.42697	0.000755	-1.34827	0.237	CG7231	CG7231-RC	16808	chr2L:7999748-8001361	25.8367	1.14e-08	28D	1	1.06017	0.525
FBtr0084292	3.96364	0.00127	2.24041	0.00958	CG5376	CG5376-RA	-2152	chr3R:18315288-18317410	26.9757	0.000374652	94B	1	1.0587	0.883
FBtr0079370	3.81899	4.92e-05	1.32594	0.685	CG32829	CG32829-RA	-50029	chr2L:6965928-6966885	37.5596	9.8e-12	27C		1.05148	0.961
FBtr0073608	1.06385	0.239	2.93298	0.000424	Hsc70-3	CG4147-RB	1721	chrX:11638944-11640192	10.5648	5e-05	10E	1.5	1.04812	0.799
FBtr0075601	1.12685	0.728	5.15863	1.13e-05	CG7945	CG7945-RB	345	chr3L:15488389-15490161	16.8834	9.31e-06	71D		1.04577	0.861
FBtr0091722	2.3158	0.00303	-1.07697	0.747	CG33724	CG33724-RA	-10882	chr2R:14143209-14144805	5.91734	2.46e-07	55E	0.25	1.04458	0.843
FBtr0083255	1.00981	0.932	3.28306	0.00199	sra	CG6072-RA	25	chr3R:12012047-12013872	18.4391	1.86e-10	89B	0.75	1.04152	0.945
FBtr0080265	2.12776	0.000368	1.60346	0.136	Tsp33B	CG14936-RA	-219807	chr2L:12010950-12012501	2.61406	0.000331293	33A		1.04111	0.946
FBtr0078223	2.71925	3.59e-05	1.46913	0.376	CG5195	CG5195-RA	-31077	chr3L:20428622-20429908	16.4846	6.79e-07	77C		1.04015	0.958
FBtr0078820	-2.0511	0.00446	1.231	0.514	Tim17a2	CG14666-RA	-109073	chr3R:1193132-1194818	7.97637	2.16e-07	82F	0.5	1.03872	0.957
FBtr0089739	-1.06264	0.519	5.60654	0.000749	CG1863	CG1863-RB	909	chr2R:5107423-5109091	15.6739	1.17e-10	45F		1.03817	0.944
FBtr0076004	-1.13587	0.4	-2.0116	0.000985	Est-P	CG17148-RA	224105	chr3L:12388088-12389562	4.93341	7.73e-05	69A		1.03672	0.922
FBtr0087568	-1.09368	0.089	3.3991	2.17e-05	Hsc70-5	CG8542-RA	236	chr2R:9769682-9771726	17.8628	1.05e-10	50E	1	1.02942	0.861
FBtr0077328	2.78524	0.00122	1.5013	0.0254	CG15458	CG15458-RA	221984	chrX:20001472-20003449	10.8077	3.13e-05	19D		1.02842	0.854
FBtr0089123	16.5565	6.89e-08	1.18227	0.695	CG32850	CG32850-RA	716852	chr4:1051559-1053588	4.93341	0.000119716	102B		1.02511	0.983
FBtr0083836	2.51041	0.00096	1.40664	0.403	CG4390	CG4390-RB	156385	chr3R:15728578-15729654	8.52112	1.06e-05	92C		1.01846	0.965
FBtr0082679	33.28	1.63e-09	162.399	6.31e-10	Hsp70Ba	CG31449-RA	89431	chr3R:8203532-8205028	12.6719	6.35e-09	87B		1.01814	0.977
FBtr0075408	-1.29397	0.192	2.31174	0.00934	argos	CG4531-RA	-13212	chr3L:16461590-16462748	1.61681	0.000809112	73A	1	1.01215	0.962
FBtr0076497	4.6517	2.27e-07	4.00403	0.0125	Hsp67Bc	CG4190-RA	-1451	chr3L:9347049-9349358	57.7682	0.000191127	67B	4	1.01166	0.953
FBtr0075641	2.58282	0.0022	-1.20288	0.426	FucTA	CG6869-RA	-169120	chr3L:14942694-14944002	10.0715	6.73e-06	71B		1.01047	0.978
FBtr0082280	4.58687	0.000702	-3.0129	0.203	CG14687	CG14687-RA	-397335	chr3R:6220920-6222439	6.22925	1.3e-07	86C	1	1.01045	0.984
FBtr0082610	4.40188	7.13e-05	1.59061	0.12	Tim17a1	CG10090-RA	-1312	chr3R:8191066-8192721	7.41461	6.25e-07	87B		1.00952	0.979
FBtr0070688	2.14513	0.00176	-1.05849	0.948	CG3009	CG3009-RA	546494	chrX:3964590-3966203	10.0715	3.75e-06	4C		1.00926	0.983
FBtr0082751	-1.14211	0.156	2.74722	0.000257	Droj2	CG8863-RA	823	chr3R:9207569-9209544	36.014	2.57e-11	87E	2	1.00829	0.975
FBtr0100354	1.16493	0.0251	3.82083	0.00858	CG10973	CG10973-RB	97	chr3L:12727567-12729247	19.7539	2.3e-07	69E		1.00723	0.993
FBtr0073764	1.40991	0.0728	2.69072	0.00763	Jafrac1	CG1633-RB	2841	chrX:13165894-13167772	11.5223	1.15e-06	11E		1.00247	0.996
FBtr0084798	-1.13679	0.336	-2.9352	0.00232	CG31422	CG31422-RA	432610	chr3R:20390880-20392074	4.93341	0.000613041	96B		1.00177	0.986
FBtr0076117	2.57641	0.000986	1.30087	0.397	CG32087	CG32087-RA	-50341	chr3L:11655105-11656356	2.61406	0.00060753	68D		-1.00196	0.997
FBtr0080434	-1.01416	0.909	2.8454	0.00963	Sir2	CG5216-RA	-87	chr2L:13164478-13166766	76.1079	3.73e-11	34A	1	-1.00301	0.994
FBtr0076510	-2.75835	0.00419	1.05435	0.821	GNBP3	CG5008-RA	-233396	chr3L:8694584-8696468	28.0939	2.24e-07	66E		-1.00507	0.993
FBtr0085263	2.48882	0.000232	1.08676	0.827	CG31253	CG31253-RA	12003	chr3R:23773782-23774898	23.1445	3.75e-07	98B		-1.00594	0.995
FBtr0084540	4.48515	4.58e-05	-1.30677	0.178	CG6000	CG6000-RA	2869	chr3R:19881629-19883671	75.0865	6.82e-08	95D	2.5	-1.0078	0.988
FBtr0075388	2.41398	0.000812	-1.03127	0.931	CG4680	CG4680-RA	102285	chr3L:16461590-16462748	1.61681	0.000809112	72E		-1.00855	0.967
FBtr0082569	-2.17162	0.00466	-1.32247	0.443	GstD2	CG4181-RA	-1110	chr3R:8195820-8197146	5.59798	1.23e-08	87B		-1.00939	0.931
FBtr0083685	2.1703	0.00191	1.3307	0.394	CG7715	CG7715-RA	-17336	chr3R:14570885-14573781	2.14149	3.04e-06	91C		-1.01622	0.943
FBtr0075073	3.83612	0.000203	1.34153	0.364	Ir75d	CG14076-RA	-181677	chr3L:19057644-19058461	5.91734	0.000520803	75E		-1.01805	0.957
FBtr0078956	-1.05987	0.403	2.37459	0.000561	CG9776	CG9776-RB	-6790	chr3R:162826-164088	2.61406	2.48e-05	82A		-1.02005	0.943
FBtr0074477	2.18674	0.00272	-1.00735	0.968	CG32556	CG32556-RA	276431	chrX:17255372-17256361	7.1266	4.97e-05	16BC		-1.02251	0.965
FBtr0076498	1.19982	0.111	8.4403	5.87e-06	Fdxh	CG4205-RA	-2731	chr3L:9347049-9349358	57.7682	0.000191127	67B	4	-1.0269	0.958
FBtr0078403	-1.25718	0.0852	-2.2133	0.00213	CG12972	CG12972-RA	173700	chr3L:21106336-21107682	5.59798	2.94e-05	78C		-1.03085	0.923
FBtr0083587	-3.14475	0.00614	-1.26934	0.127	CG15803	CG15803-RA	-43362	chr3R:14223904-14225819	12.6719	5.1e-07	91A		-1.03255	0.653
FBtr0078484	1.01286	0.914	9.29911	0.000473	CG7130	CG7130-RA	899	chr3L:22007919-22009956	60.2756	1.58e-05	79B		-1.03451	0.811
FBtr0075065	2.76729	0.00118	-1.03662	0.931	CG11637	CG11637-RA	200333	chr3L:19057644-19058461	5.91734	0.000520803	75E		-1.03689	0.98
FBtr0089367	6.82838	0.00212	1.44897	0.176	Cha	CG12345-RA	40282	chr3R:14570885-14573781	2.14149	3.04e-06	91C		-1.03805	0.917
FBtr0075923	3.85061	0.00595	1.60901	0.374	CG17666	CG17666-RB	-28672	chr3L:12727567-12729247	19.7539	2.3e-07	69E		-1.03956	0.935
FBtr0076941	2.68426	0.0041	7.76481	0.0138	CG10077	CG10077-RA	-104	chr3L:6928762-6930466	22.4499	4.39e-07	65D		-1.04035	0.921
FBtr0083807	-2.16865	0.00304	-1.39142	0.0332	CG6231	CG6231-RD	-275626	chr3R:15728578-15729654	8.52112	1.06e-05	92A		-1.04323	0.953
FBtr0087408	2.04812	0.00375	1.00118	0.998	CG10257	CG10257-RA	-38098	chr2R:10419053-10419906	8.52112	0.000829908	51D		-1.05119	0.946
FBtr0079717	2.14138	0.00302	1.25315	0.552	CG13394	CG13394-RB	222174	chr2L:8169578-8171233	6.83333	2.6e-07	29C		-1.05188	0.864
FBtr0100653	2.11275	0.000753	14.1214	0.000158	Hsp67Bb	CG4456-RA	838	chr3L:9347049-9349358	57.7682	0.000191127	67B	4	-1.06049	0.868
FBtr0078567	3.94216	0.000263	1.37441	0.398	CG32461	CG32461-RA	85692	chr3L:22802869-22804270	12.4458	3.44e-06	80C		-1.06356	0.926
FBtr0085903	-1.10553	0.132	2.68666	0.000887	CG1416	CG1416-RA	410	chr2L:21745440-21746932	6.53438	1.35e-08	40A		-1.06387	0.691
FBtr0081756	1.13622	0.144	7.33767	6.86e-05	Taf7	CG2670-RA	353	chr3R:3732891-3734407	17.8628	7.06e-11	84E	2	-1.06422	0.67
FBtr0072363	2.11573	0.00439	1.05386	0.938	slik	CG4527-RC	205978	chr2R:19703811-19704919	3.46237	0.000272664	60C		-1.06674	0.915
FBtr0088900	-1.12947	0.219	4.37863	8.86e-08	CG1553	CG1553-RA	144	chr2R:3316103-3319183	19.1953	9.64e-11	43E	2	-1.07724	0.868
FBtr0076471	1.11483	0.257	3.29614	0.00049	pall	CG3428-RA	497	chr3L:9460504-9461846	4.58596	6.21e-05	67B	4	-1.07793	0.793
FBtr0087678	-1.25786	0.00147	2.16792	0.00193	CG6191	CG6191-RA	1430	chr2R:9107112-9110325	16.4846	8.42e-11	50B	1	-1.08951	0.714
FBtr0076452	2.18591	0.0526	4.69394	0.00458	CG4461	CG4461-RA	-1660	chr3L:9347049-9349358	57.7682	0.000191127	67B	4	-1.09055	0.783
FBtr0080307	1.48182	0.0175	8.09099	1.31e-07	CG6785	CG6785-RA	-1290	chr2L:12043983-12048082	35.4446	2.43e-11	33B	3	-1.0942	0.682
FBtr0073746	-1.10314	0.721	2.23303	0.000393	CG4351	CG4351-RA	-222492	chrX:13157616-13159286	7.97637	1.08e-05	11D		-1.09765	0.63
FBtr0082378	1.1379	0.133	-2.29883	0.000438	Ugt86Di	CG6658-RA	-56448	chr3R:7035202-7037714	16.6846	2.91e-10	86D	1	-1.10033	0.546
FBtr0088931	-1.38199	0.313	2.19478	0.000462	cn	CG1555-RA	2174	chr2R:3293640-3296395	17.0813	1.25e-09	43E	2	-1.10205	0.822
FBtr0075185	3.17379	0.00125	1.3646	0.333	Ccn	CG32183-RA	-110311	chr3L:17543808-17545449	11.5223	0.000148511	74F-75A		-1.10243	0.906
FBtr0071909	4.13118	1.35e-08	1.07408	0.755	inaD	CG3504-RA	175094	chr2R:18190719-18191934	2.14149	9.65e-05	59B		-1.10488	0.896
FBtr0087773	2.37591	0.00738	-1.13014	0.726	CG15870	CG15870-RA	123694	chr2R:8555726-8556964	16.4846	1.54e-07	49F		-1.11039	0.795
FBtr0074694	3.56164	0.00119	1.04357	0.907	CG7990	CG7990-RB	312744	chrX:18722225-18723871	10.0715	1.27e-06	18AB		-1.1188	0.869
FBtr0073149	-2.55838	0.00864	-1.1864	0.667	CG12006	CG12006-RA	-4732	chr3L:3789489-3790843	3.85281	0.000721652	63F		-1.12358	0.687
FBtr0078630	-1.1671	0.109	-2.2418	0.00458	CG1218	CG1218-RA	-132020	chr3R:1485026-1486855	6.53438	1.12e-06	83C		-1.12701	0.479
FBtr0082889	-2.46802	0.0033	-1.67298	0.0629	Npc2b	CG3153-RB	-374776	chr3R:9539634-9540992	16.0815	1.18e-07	88A		-1.12899	0.738
FBtr0091491	2.21802	0.00902	1.16111	0.72	Vmat	CG33528-RD	-62056	chr2R:9107112-9110325	16.4846	8.42e-11	50AB		-1.13084	0.842
FBtr0087815	1.2294	0.109	4.22659	0.000424	CG3790	CG3790-RA	3010	chr2R:8387633-8388608	7.97637	7.91e-06	49D	1	-1.13934	0.825
FBtr0075691	-1.11997	0.155	3.02622	0.000324	CG13472	CG13472-RA	115	chr3L:14751486-14752844	11.7562	9.33e-06	70F		-1.14371	0.665
FBtr0085113	3.74849	5.34e-05	1.07639	0.71	CG31067	CG31067-RA	788490	chr3R:23773782-23774898	23.1445	3.75e-07	97E		-1.14382	0.816
FBtr0087514	2.65661	0.00119	-1.06036	0.83	Cpr51A	CG10112-RA	11248	chr2R:10018499-10019581	7.69776	7.24e-05	51A	1	-1.15047	0.643
FBtr0088252	1.17178	0.311	-2.0434	0.000121	CG7637	CG7637-RA	-65078	chr2R:6391389-6392361	14.4215	0.000136473	47C	0.75	-1.153	0.778
FBtr0076570	-1.13073	0.0296	7.83925	1.34e-06	CG6511	CG6511-RA	36	chr3L:8694584-8696468	28.0939	2.24e-07	66D		-1.15779	0.685
FBtr0075060	1.19595	0.348	-2.31396	9.1e-06	CG6865	CG6865-RA	228467	chr3L:19057644-19058461	5.91734	0.000520803	75E		-1.15835	0.588
FBtr0085651	1.14259	0.713	4.8667	0.00139	spdo	CG31020-RA	-194352	chr3R:26107728-26108819	6.22925	5.72e-05	99F	1	-1.15885	0.694
FBtr0077585	1.08912	0.506	-2.11909	0.00268	CG33282	CG33282-RA	-420477	chr2L:2906934-2908425	6.83333	3.61e-08	23E		-1.17009	0.581
FBtr0075955	1.13481	0.54	3.44426	0.00554	Pbprp1	CG10436-RA	18672	chr3L:12388088-12389562	4.93341	7.73e-05	69B		-1.17247	0.785
FBtr0079004	6.24605	0.000641	1.36122	0.0844	SP555	CG14041-RB	-28158	chr2L:5009250-5011489	36.014	2.43e-08	25C	1	-1.17272	0.795
FBtr0091659	2.00932	0.0037	1.24377	0.63	CG33679	CG33679-RA	-19533	chr2L:15034158-15035283	6.22925	7.89e-06	35B		-1.17327	0.832
FBtr0084600	4.30727	2.94e-06	1.36046	0.264	CG13611	CG13611-RA	-93116	chr3R:20011631-20013204	13.1189	1.61e-05	95F	1	-1.18203	0.738
FBtr0078770	-1.15388	0.114	3.74721	0.000383	PEK	CG2087-RA	1048	chr3R:1288829-1290895	6.22925	5.22e-05	83A	0.5	-1.18858	0.428
FBtr0070993	1.05834	0.238	3.00568	6.09e-05	CG3226	CG3226-RA	-125	chrX:6498629-6500630	32.8302	1.25e-07	6C		-1.19275	0.592
FBtr0075489	2.89468	0.000133	1.45482	0.308	CG32152	CG32152-RA	-14606	chr3L:16123028-16125125	3.85281	6.32e-05	72D		-1.19618	0.747
FBtr0088173	-2.07186	0.00471	-1.39699	0.0489	CG13211	CG13211-RA	62800	chr2R:6750044-6750908	4.58596	0.00013349	47F	0.5	-1.19966	0.782
FBtr0073648	-2.75804	0.00766	-1.02254	0.952	CG17788	CG17788-RA	203221	chrX:12500388-12502334	20.488	9.8e-07	11A		-1.20182	0.575
FBtr0071371	1.09185	0.538	-2.08621	0.0037	CG15317	CG15317-RA	-323072	chrX:9723983-9725481	4.93341	0.0001422	8E		-1.20453	0.194
FBtr0078131	-1.11869	0.239	2.9127	0.000122	Hop	CG2720-RA	108	chr2L:294084-296317	72.6094	3.23e-09	21B	1	-1.20598	0.535
FBtr0077065	-1.16948	0.282	-2.34016	0.00389	CG13295	CG13295-RA	309531	chr3L:5739121-5740716	20.488	4.24e-07	65A	1.5	-1.21234	0.197
FBtr0071182	2.73905	4.6e-07	3.05946	0.00683	CG32715	CG32715-RA	1718	chrX:8089102-8091019	9.5672	8.41e-06	7DE		-1.23282	0.68
FBtr0087781	2.77234	0.00232	1.05296	0.837	Or49b	CG17584-RA	28865	chr2R:8387633-8388608	7.97637	7.91e-06	49D	1	-1.23319	0.651
FBtr0083599	2.00203	0.00349	-1.59759	0.301	CG14312	CG14312-RA	-9003	chr3R:14117414-14118896	5.91734	3.68e-06	91A		-1.23446	0.551
FBtr0075152	-1.02265	0.858	15.2596	6.8e-08	CG5290	CG5290-RA	81	chr3L:17877047-17879091	34.2936	4.31e-07	75A		-1.24117	0.499
FBtr0080306	2.9711	0.00125	1.73589	0.203	CG6770	CG6770-RA	-390	chr2L:12043983-12048082	35.4446	2.43e-11	33B	3	-1.24388	0.568
FBtr0076021	2.60421	7.2e-05	-1.01036	0.986	CG9760	CG9760-RB	-255260	chr3L:12388088-12389562	4.93341	7.73e-05	68F		-1.24393	0.475
FBtr0081816	-1.61349	0.0169	5.29747	9.67e-08	CG11035	CG11035-RA	-620	chr3R:3858381-3860283	31.4881	4.5e-11	84E	2	-1.24722	0.334
FBtr0072670	-1.07856	0.334	2.6134	0.000602	CG9153	CG9153-RB	260	chr3L:1296972-1298530	25.6721	1.93e-07	61F	1.5	-1.25146	0.286
FBtr0080305	-1.18517	0.341	4.50233	0.00117	CG6792	CG6792-RA	2428	chr2L:12043983-12048082	35.4446	2.43e-11	33B	3	-1.25313	0.673
FBtr0077123	5.31927	3.25e-08	42.0278	2.11e-05	DnaJ-1	CG10578-RB	219	chr3L:5723525-5727510	27.4574	1.18e-07	64E		-1.25852	0.108
FBtr0072777	1.04877	0.602	2.32937	0.00749	Cdc37	CG12019-RA	-153419	chr3L:1625001-1626165	11.5223	0.000114196	62B	1.5	-1.26001	0.252
FBtr0100410	3.86791	0.000637	1.85281	0.228	GstD1	CG10045-RA	-1622	chr3R:8195820-8197146	5.59798	1.23e-08	87B		-1.27144	0.842
FBtr0076586	2.26064	0.00222	-1.34575	0.409	TrpA1	CG5751-RA	180018	chr3L:8694584-8696468	28.0939	2.24e-07	66E		-1.27331	0.209
FBtr0100216	-1.29655	0.0857	-2.27429	0.00821	scra	CG2092-RC	-101427	chr2R:2999801-3001257	10.8077	2.15e-09	43E	2	-1.27488	0.399
FBtr0076453	10.2376	8.55e-08	8.27032	0.00593	Hsp23	CG4463-RA	1829	chr3L:9354259-9358447	69.883	6.69e-08	67B	4	-1.27873	0.0587
FBtr0082338	-1.17747	0.233	-2.01426	0.00232	Ugt86Da	CG18578-RA	53145	chr3R:7035202-7037714	16.6846	2.91e-10	86D	1	-1.2818	0.287
FBtr0073965	-1.07612	0.273	-2.19347	0.00724	CG15027	CG15027-RA	11081	chrX:14908334-14908991	24.0001	2.92e-05	13A	1	-1.28777	0.381
FBtr0077920	-2.90419	0.00346	-1.04088	0.958	CG5397	CG5397-RA	-156256	chr2L:1082720-1084453	2.61406	1.03e-05	21F		-1.28843	0.84
FBtr0087293	1.01458	0.75	2.15809	0.00442	Mlf	CG8295-RD	-183450	chr2R:11637901-11639362	1.61681	0.00038091	52D		-1.28894	0.364
FBtr0083134	-1.22631	0.0257	-2.25587	0.000128	Art3	CG6563-RB	-13635	chr3R:11067176-11070357	65.4847	3.64e-12	88E		-1.28972	0.569
FBtr0084589	24.7486	2.24e-10	106.754	4.23e-08	Hsp68	CG5436-RA	-74	chr3R:19881629-19883671	75.0865	6.82e-08	95D	2.5	-1.30992	0.64
FBtr0079404	4.25859	1.55e-06	-1.09814	0.859	CG11289	CG11289-RA	-101602	chr2L:6965928-6966885	37.5596	9.8e-12	27DE		-1.33492	0.796
FBtr0070095	-1.02658	0.858	-2.02681	0.00965	CG18166	CG18166-RA	-11186	chrX:349227-350721	10.5648	0.000135865	1B		-1.33551	0.178
FBtr0088117	1.05684	0.699	-2.51307	0.00217	CG30033	CG30033-RB	-57852	chr2R:6750044-6750908	4.58596	0.00013349	47F	0.5	-1.34422	0.232
FBtr0082319	1.15466	0.0588	-2.27101	0.00231	CG31278	CG31278-RA	312756	chr3R:6220920-6222439	6.22925	1.3e-07	86C	1	-1.346	0.044
FBtr0081788	-1.11252	0.39	6.49258	9.74e-05	Tom34	CG2708-RA	263	chr3R:3858381-3860283	31.4881	4.5e-11	84E	2	-1.3503	0.272
FBtr0076495	1.35145	0.254	7.67691	0.00368	Hsp67Ba	CG4167-RA	1707	chr3L:9350897-9352742	74.5734	8.76e-08	67B	4	-1.35606	0.809
FBtr0075966	-2.0343	0.00981	-1.44493	0.126	Tsf2	CG10620-RA	10649	chr3L:12496249-12497499	6.53438	5.96e-06	69C		-1.36966	0.701
FBtr0080708	-1.01186	0.904	-2.30679	0.00239	l(2)35Cc	CG15266-RA	-217881	chr2L:15034158-15035283	6.22925	7.89e-06	35C		-1.37385	0.239
FBtr0076496	12.1652	1.43e-09	28.4877	0.000112	Hsp26	CG4183-RA	-305	chr3L:9350897-9352742	74.5734	8.76e-08	67B	4	-1.37598	0.524
FBtr0075080	-1.00427	0.969	-2.39244	0.000216	Rad9	CG3945-RA	-220172	chr3L:19057644-19058461	5.91734	0.000520803	75E		-1.37688	0.145
FBtr0086807	1.20515	0.161	-2.17123	0.00888	CG10912	CG10912-RA	-84948	chr2R:13655506-13659016	10.8077	7.15e-10	55B	1.5	-1.37876	0.59
FBtr0081752	-1.20512	0.158	-2.55944	0.000841	CG10092	CG10092-RA	20602	chr3R:3732891-3734407	17.8628	7.06e-11	84E	2	-1.4013	0.0522
FBtr0088677	-1.17613	0.0702	-2.2323	0.00649	CG8247	CG8247-RA	8886	chr2R:4424943-4426004	10.0715	7.39e-07	44F	1.5	-1.41132	0.00566
FBtr0070230	-2.05799	0.00739	-1.49401	0.486	CG14786	CG14786-RA	60717	chrX:1256171-1257211	4.58596	8.04e-05	2A	1.5	-1.41458	0.789
FBtr0082248	-1.43391	0.0163	-2.03941	0.000936	Rrp46	CG4043-RA	-17730	chr3R:6220920-6222439	6.22925	1.3e-07	86B		-1.42082	0.472
FBtr0085116	-1.51936	0.146	-2.34552	0.00203	spn-D	CG31069-RA	782849	chr3R:23773782-23774898	23.1445	3.75e-07	97E		-1.42336	0.16
FBtr0074387	1.05763	0.617	3.40922	0.00127	CG5010	CG5010-RA	-376	chrX:16981807-16985919	25.5071	1.7e-07	15E		-1.42801	0.402
FBtr0087338	1.44262	0.00568	-3.32572	0.00193	CG12963	CG12963-RB	134408	chr2R:11210120-11211138	4.22644	0.000568727	52A		-1.4419	0.0824
FBtr0075698	-1.02605	0.602	-2.44665	0.000473	NHP2	CG5258-RA	11899	chr3L:14754955-14756261	4.22644	1.41e-05	70F		-1.45474	0.125
FBtr0082115	-1.12427	0.132	-2.57032	0.00102	CG9386	CG9386-RA	-75482	chr3R:5455574-5458627	5.91734	4.69e-07	85D	1	-1.4574	0.185
FBtr0070681	-1.05284	0.66	-2.14695	0.00341	pon	CG3346-RA	-516126	chrX:3964590-3966203	10.0715	3.75e-06	4C		-1.46336	0.72
FBtr0083409	1.00201	0.98	-2.49089	0.00207	CG5285	CG5285-RA	-34796	chr3R:12940937-12942490	13.5592	6.14e-05	89F		-1.46351	0.492
FBtr0084969	-1.04696	0.594	-2.58489	0.00511	CG14544	CG14544-RA	178021	chr3R:22062750-22064079	7.41461	4.01e-05	96F		-1.46379	0.475
FBtr0073154	-2.10024	0.00251	-1.23452	0.535	Rdh	CG14975-RA	-18987	chr3L:3789489-3790843	3.85281	0.000721652	63F		-1.46658	0.682
FBtr0082276	-2.21361	0.00838	-2.00074	0.00346	Rbp1	CG17136-RA	-388811	chr3R:6220920-6222439	6.22925	1.3e-07	86C	1	-1.47267	0.432
FBtr0077355	-3.05392	0.000375	1.03405	0.945	l(1)G0196	NA	#N/A	#N/A	#N/A	#N/A	#N/A		-1.48235	0.337
FBtr0072615	1.86072	0.128	-2.08334	0.00744	Glut1	CG1086-RA	386417	chr3L:1283128-1284910	11.988	2.71e-06	61DE		-1.49256	0.263
FBtr0083061	2.10101	0.0442	2.65613	0.00811	CG4285	CG4285-RA	-4956	chr3R:11071788-11074349	35.1584	1.16e-11	88E		-1.50357	0.283
FBtr0083055	-1.10274	0.103	2.09619	3.16e-06	Hsc70-4	CG4264-RD	-123	chr3R:11067176-11070357	65.4847	3.64e-12	88E		-1.52153	0.0588
FBtr0082067	-1.16197	0.394	-2.16607	0.00559	CG8199	CG8199-RA	75068	chr3R:5455574-5458627	5.91734	4.69e-07	85D	1	-1.52897	0.355
FBtr0076689	-1.53694	0.0713	-2.1934	0.00526	mus301	CG7972-RA	-162313	chr3L:7949117-7950918	5.27034	2.37e-05	66B	2	-1.5475	0.297
FBtr0075522	-1.37336	0.0475	-2.07105	0.000713	DNApol-delta	CG5949-RA	-56812	chr3L:16009148-16010205	4.93341	0.000625184	72C	1	-1.55907	0.438
FBtr0076454	8.79958	7.56e-07	7.48757	0.000178	Hsp27	CG4466-RA	-352	chr3L:9354259-9358447	69.883	6.69e-08	67B	4	-1.57952	0.00449
FBtr0082347	-2.54336	0.00674	-1.80834	0.101	RpL3	CG4863-RA	-11651	chr3R:7035202-7037714	16.6846	2.91e-10	86D	1	-1.58777	0.503
FBtr0088565	1.07375	0.352	-2.4746	0.00594	CG8777	CG8777-RA	-155398	chr2R:4453010-4456020	28.252	8.67e-12	45A		-1.58817	0.0298
FBtr0076005	1.03152	0.883	-3.19895	0.0089	CG11529	CG11529-RA	216936	chr3L:12388088-12389562	4.93341	7.73e-05	69A		-1.59655	0.192
FBtr0071895	1.06267	0.55	-3.98283	0.00374	CG9826	CG9826-RB	-157134	chr2R:18190719-18191934	2.14149	9.65e-05	59B		-1.5995	0.135
FBtr0083921	-1.13633	0.0251	-2.60336	0.00809	cdc2c	CG10498-RB	92958	chr3R:16653528-16655177	20.8507	2.57e-06	92F		-1.61276	0.304
FBtr0076900	-1.112	0.482	-2.13999	0.00998	bin	CG18647-RA	-34613	chr3L:6928762-6930466	22.4499	4.39e-07	65D		-1.62171	0.0058
FBtr0076134	-1.08055	0.696	-2.58325	0.000617	CG11660	CG11660-RA	-33140	chr3L:11655105-11656356	2.61406	0.00060753	68D		-1.6384	0.0354
FBtr0100244	-1.14499	0.242	3.15696	0.00437	tra	CG16724-RB	248	chr3L:16555870-16557145	5.27034	0.000110485	73A	1	-1.63921	0.00611
FBtr0075771	-1.09344	0.235	2.68121	0.000147	Hsc70Cb	CG6603-RC	195	chr3L:14002076-14004156	30.1201	1.31e-07	70C	1	-1.64026	0.103
FBtr0083144	-1.31299	0.153	-2.51139	0.000949	CG31297	CG31297-RA	81784	chr3R:11372128-11373829	3.46237	3.78e-07	88F		-1.65042	0.234
FBtr0088485	1.0994	0.166	-2.23772	0.00363	Lsm11	CG12924-RA	-6561	chr2R:5357351-5358344	4.22644	0.000265824	46B	1	-1.65784	0.116
FBtr0073843	-2.02391	0.000161	-1.23675	0.36	CG9941	CG9941-RA	87180	chrX:13468162-13469297	6.83333	2.83e-05	12B	1	-1.67272	0.485
FBtr0081131	-1.3726	0.00697	-2.88949	0.000462	tos	CG10387-RA	-157727	chr2L:18834796-18836471	10.3195	1.74e-07	36F	1	-1.67678	0.136
FBtr0073160	-1.56235	0.04	-2.06633	0.000127	ida	CG10850-RA	-2771	chr3L:3885132-3887489	36.1557	2.44e-07	63F		-1.6973	0.209
FBtr0074092	-1.25087	0.214	-2.41304	0.00384	CG33172	CG33172-RA	-22696	chrX:15580343-15582517	21.3896	3.92e-07	13E	2	-1.70382	0.0901
FBtr0076369	-1.00242	0.975	-2.18995	0.00315	Cdk8	CG10572-RA	146034	chr3L:9665344-9667424	22.099	3.17e-06	67C	2	-1.71623	0.0633
FBtr0071711	-1.18511	0.267	-2.10706	0.00391	LBR	CG17952-RB	-75571	chr2R:17151956-17153867	15.0535	4.46e-10	57F	1.5	-1.72107	0.126
FBtr0074355	-1.29538	0.101	-2.06562	0.00985	Rrp45	CG9606-RA	82056	chrX:16542143-16543696	9.82077	5.93e-06	15A		-1.74514	0.434
FBtr0083275	-1.31711	0.105	-2.45328	0.000641	Mat89Ba	CG12785-RA	85444	chr3R:12012047-12013872	18.4391	1.86e-10	89B	0.75	-1.75345	0.0152
FBtr0072734	2.79637	8.41e-05	-1.28595	0.243	CG9192	CG9192-RA	-62177	chr3L:1283128-1284910	11.988	2.71e-06	61F	1.5	-1.76165	0.124
FBtr0081125	2.00041	0.000642	-1.54831	0.379	Irk3	CG10369-RA	-126347	chr2L:18834796-18836471	10.3195	1.74e-07	37A		-1.77512	0.192
FBtr0086646	-1.09886	0.39	-2.78058	0.00159	CG15088	CG15088-RB	-72609	chr2R:14317204-14318408	5.59798	2.9e-08	55E	0.25	-1.81971	0.301
FBtr0077614	-1.18798	0.129	-2.15336	0.0045	CG3485	CG3485-RA	265251	chr2L:2906934-2908425	6.83333	3.61e-08	23D		-1.84021	0.291
FBtr0100424	1.37865	0.00887	-2.13573	0.00355	CG6995	CG6995-RB	-251914	chr3R:20390880-20392074	4.93341	0.000613041	96A	1	-1.8767	0.0714
FBtr0087170	-1.17196	0.203	-2.11673	0.00629	l(2)k07824	CG7989-RA	217865	chr2R:11643607-11645632	23.3167	2.41e-11	53C		-1.8784	0.0876
FBtr0073905	-2.78641	0.00153	-1.33157	0.071	mud	CG12047-RA	-38835	chrX:14042419-14043779	20.8507	5.05e-07	12E	1	-1.92075	0.196
FBtr0081712	-1.33422	0.135	-2.55649	0.00423	CG18048	CG18048-RA	23454	chr3R:2194193-2196014	4.58596	9.2e-06	83E		-1.95647	0.245
FBtr0073987	-1.64094	0.0342	-2.33517	0.00232	CG12539	CG12539-RA	-180377	chrX:14858542-14859977	5.91734	2.75e-05	12F	1	-1.96203	0.254
FBtr0085391	-1.78852	0.00124	-4.30907	0.000956	CG31044	CG31044-RA	67956	chr3R:25109854-25111548	9.31061	6.89e-06	99A		-2.01381	0.0952
FBtr0071414	-1.32611	0.147	-2.50986	6.22e-05	CG2990	CG2990-RB	72712	chrX:9928105-9929867	6.83333	1e-05	9A		-2.01424	0.000254
FBtr0084270	-1.37763	0.059	-1.52513	0.00878	CG31159								-2.016	0.00132
FBtr0078523	-1.10344	0.35	-2.85564	0.00238	CG32452	CG32452-RB	6350	chr3L:22657469-22658756	21.3896	6.78e-05	79F-80A		-2.08151	0.144
FBtr0085665	-1.09483	0.69	1.03998	0.905	CG31019								-2.10919	0.000246
FBtr0074973	-1.48272	0.0551	-1.47397	0.376	Shal								-2.12053	0.00369
FBtr0080407	-1.30917	0.322	-2.17802	0.00839	CG5776	CG5776-RA	11570	chr2L:12692338-12693387	10.3195	3.18e-10	33F		-2.13779	0.373
FBtr0077329	2.5606	0.000613	1.17812	0.861	CG15459	CG15459-RA	221505	chrX:20001472-20003449	10.8077	3.13e-05	19CD		-2.17327	0.129
FBtr0075484	-1.42588	0.00557	-4.50023	2.23e-05	CG5018	CG5018-RA	70298	chr3L:16123028-16125125	3.85281	6.32e-05	72D		-2.17939	0.0543
FBtr0075748	1.00253	0.985	-2.07346	0.00237	Sox21a	CG7345-RA	69625	chr3L:14002076-14004156	30.1201	1.31e-07	70D		-2.2034	0.0109
FBtr0077524	1.18511	0.331	-3.2904	0.0186	Thor								-2.21942	0.00631
FBtr0073685	1.42533	0.000872	-4.06815	2.01e-05	CG15725	CG15725-RA	32833	chrX:12572637-12573681	24.6749	0.000181586	11B		-2.25936	0.191
FBtr0081258	-1.10787	0.0446	-1.3143	0.159	msb1l								-2.27681	0.00977
FBtr0085709	-1.19079	0.278	-2.5822	0.00559	tll	CG1378-RA	-78085	chr3R:26599221-26600273	2.61406	0.000963387	100A		-2.32977	0.0128
FBtr0081102	-1.00614	0.956	-6.33366	0.000465	CG17325	CG17325-RA	26870	chr2L:18834796-18836471	10.3195	1.74e-07	37A		-2.46753	0.0652
FBtr0071032	-1.68202	0.0303	-2.98953	0.0191	CG3032								-2.48437	0.00359
FBtr0083213	-1.50642	0.0325	-2.90842	0.00019	Rbf2	CG5083-RA	91862	chr3R:11882465-11883571	3.85281	6.47e-05	89A		-2.62978	0.0124
FBtr0079911	-1.13757	0.395	-2.62466	0.000269	CG5924	CG5924-RA	-1525	chr2L:9894142-9895273	3.46237	1.52e-05	30E		-2.65361	0.00504
FBtr0070153	-1.14737	0.364	-2.29956	0.00714	Dredd	CG7486-RE	-86015	chrX:615150-616621	4.58596	5.01083e-05	#N/A		-2.70068	0.163
FBtr0083564	1.04377	0.825	-2.19722	0.00489	repo	CG31240-RA	7455	chr3R:14068831-14070046	4.58596	7.73e-06	90F		-2.73625	0.156
FBtr0083574	-1.56796	0.0267	-2.16921	0.00552	CG8064	CG8064-RA	8796	chr3R:14117414-14118896	5.91734	3.68e-06	91A		-2.84835	0.118
FBtr0078685	-2.33064	0.00127	-1.89601	0.0228	CG31550	CG31550-RA	-23568	chr3R:1288829-1290895	6.22925	5.22e-05	83A	0.5	-2.92205	0.0499

## Sheet: read me
the data table is sorted by the fold change exhibited by hsf4 larvae in decending order
blue highlighted genes: changed in hsf4 larvae more than 2 fold with a (non-FDR corrected)p-value of <0.01 but NOT changed in dp larave by more than 2 fold with a (FDR corrected) p-value of < 0.01
yellow highlighted genes: changed in hsf4 larvae more than 2 fold with a (non-FDR corrected) p-value of <0.01 AND changed in dp larave by more than 2 fold with a (FDR corrected) p-value of < 0.01
genes that are not highlighted but that show a fold change of greater than 2 fold in hsf4 larvae did not pass the p-value cutoff of 0.01
